# Supplementary material
Source: MDPI journal article supplement (https://www.mdpi.com/2673-527X/1/1/2)
Supplement: s1 [file s1]

**Table S2. Chemical Composition of Tracheobronchial Glycoproteins from Patients with and without Cystic Fibrosis <sup>a</sup>**

| Constituent                      | Non-Purulent | Purulent | Cystic Fibrosis |
|----------------------------------|--------------|----------|-----------------|
| Protein                          | 20.02        | 17.21    | 18.89           |
| Fucose                           | 9.34         | 10.09    | 9.09            |
| Galactose                        | 17.76        | 18.12    | 16.03           |
| <i>N</i> -acetyl-Galactosamine   | 10.50        | 10.27    | 11.51           |
| <i>N</i> -acetyl-Glucosamine     | 16.15        | 15.14    | 13.99           |
| <i>N</i> -acetyl-Neuraminic acid | 21.18        | 22.33    | 24.87           |
| Sulfate                          | 3.55         | 3.98     | 5.66            |

<sup>a</sup> Data expressed as grams per 100 grams of glycoprotein sample.
