# Supplementary material
Source: MDPI journal article supplement (https://www.mdpi.com/2673-527X/1/1/2)
Supplement: s1 [file s1]

**Table S3. CF Bronchiolar Plugs Solubility Times with Corresponding DNA and Glycoprotein Content** <sup>a, b</sup>

| <b>Fraction</b> | <b>n =</b> | <b>Characteristic</b> | <b>Mean</b>          | <b>Range</b>       | <b>GP:DNA<sup>c</sup></b> |
|-----------------|------------|-----------------------|----------------------|--------------------|---------------------------|
| I               | 13         | <b>hours</b>          | <b>6h +/- 3.57</b>   | <b>1.2 - 10.5</b>  | <i>1.20</i>               |
|                 |            | DNA %                 | 4.1 +/- 0.85         | 2.9 - 5.9          |                           |
|                 |            | GP %                  | 4.9 +/- 0.49         | 4.2 - 5.9          |                           |
| II              | 17         | <b>hours</b>          | <b>15.2 +/- 2.15</b> | <b>11.5 - 18.0</b> | <i>1.00</i>               |
|                 |            | DNA                   | 5.7 +/- 0.87         | 3.9 - 6.8          |                           |
|                 |            | GP                    | 5.7 +/- 0.99         | 4.5 - 7.5          |                           |
| III             | 34         | <b>hours</b>          | <b>15.4 +/- 2.30</b> | <b>10.4 - 20.0</b> | <i>0.50</i>               |
|                 |            | DNA                   | 8.2 +/- 0.61         | 7.0 - 9.2          |                           |
|                 |            | GP                    | 4.1 +/- 1.12         | 2.7 - 7.0          |                           |
| IV              | 13         | <b>hours</b>          | <b>6.5 +/- 2.39</b>  | <b>4.0 - 10.6</b>  | <i>0.31</i>               |
|                 |            | DNA                   | 9.5 +/- 0.32         | 8.7 - 9.8          |                           |
|                 |            | GP                    | 2.9 +/- 0.45         | 2.2 - 3.7          |                           |

<sup>a</sup> All DNA and glycoprotein (GP) data are expressed as percent of macromolecular dry weight (% MDW).

<sup>b</sup> CF bronchiolar plugs were analyzed for both GP and DNA content, as well as time to complete solubilization in chaotropic agent. Grouping specimens (77 total) by relative amounts of GP and DNA in each of analyzed plug specimen permitted comparisons of characteristics and their impacts on solubilization.

<sup>c</sup> The four fraction classifications (I, II, III, IV) and the data for those groups of plug specimens were used for the calculations of ratio GP:DNA content.
