# Supplementary material
Source: MDPI journal article supplement (https://www.mdpi.com/2673-527X/1/1/2)
Supplement: s1 [file s1]

**Table S1. Additional Details of Chemical Composition of Non-purulent, Purulent, and Cystic Fibrosis Sputum**<sup>a,b</sup>

| Constituent                            | Non-Purulent <sup>c</sup><br>(n = 213) | Purulent<br>(n = 322)    | Cystic Fibrosis<br>(n = 468) |
|----------------------------------------|----------------------------------------|--------------------------|------------------------------|
| Water (mg/ml)                          | 959 ± 15                               | 939 ± 17                 | 862 ± 35 <sup>d</sup>        |
| Macromolecular dry weight (MDW, mg/mL) | 43 ± 2.4                               | 61 ± 7.6 <sup>d</sup>    | 98 ± 13.4 <sup>d</sup>       |
| Protein, mg/mL                         | 13.6 ± 1.2                             | 19.1 ± 4.9 <sup>d</sup>  | 42.2 ± 19.4 <sup>d</sup>     |
| Lipid, mg/mL                           | 10.9 ± 0.6                             | 19.0 ± 1.5 <sup>d</sup>  | 33.5 ± 4.1 <sup>d</sup>      |
| Phosphatidylcholine (% of total lipid) | 0.27 %                                 | 0.36 %                   | 52.3 % <sup>d</sup>          |
| Carbohydrate, mg/mL                    | 8.8 ± 1.1                              | 12.4 ± 1.6 <sup>d</sup>  | 14.6 ± 2.5                   |
| Fucose (% of total sugar)              | 18.3 %                                 | 17.6 %                   | 13.7 %                       |
| Sialic acid (% of total sugar)         | 16.9 %                                 | 20.7 %                   | 27.1 %                       |
| DNA, mg/mL                             | 0.006 ± 0.003                          | 0.88 ± 0.26 <sup>d</sup> | 2.88 ± 1.36 <sup>d</sup>     |
| No. samples assayed <sup>b</sup>       | 213                                    | 322                      | 468                          |
| No. of patients <sup>b</sup>           | 191                                    | 287                      | 117                          |

<sup>a</sup> Data expressed as mg/ml sputum ± S.D., unless otherwise indicated.

<sup>b</sup> Number of samples assayed (n), 4 separate samples assayed per CF patient, 1 - 2 samples for other patient types (non-purulent non-CF, and purulent non-CF specimens).

<sup>c</sup> Non-purulent sputum is defined as that having less than 0.025 % DNA content (based on MDW).

<sup>d</sup> Significance of p < 0.005, Student's t-test, compared with non-purulent and purulent values.
