# Supplementary material
Source: MDPI journal article supplement (https://www.mdpi.com/2673-527X/1/1/2)
Supplement: s1 [file s1]

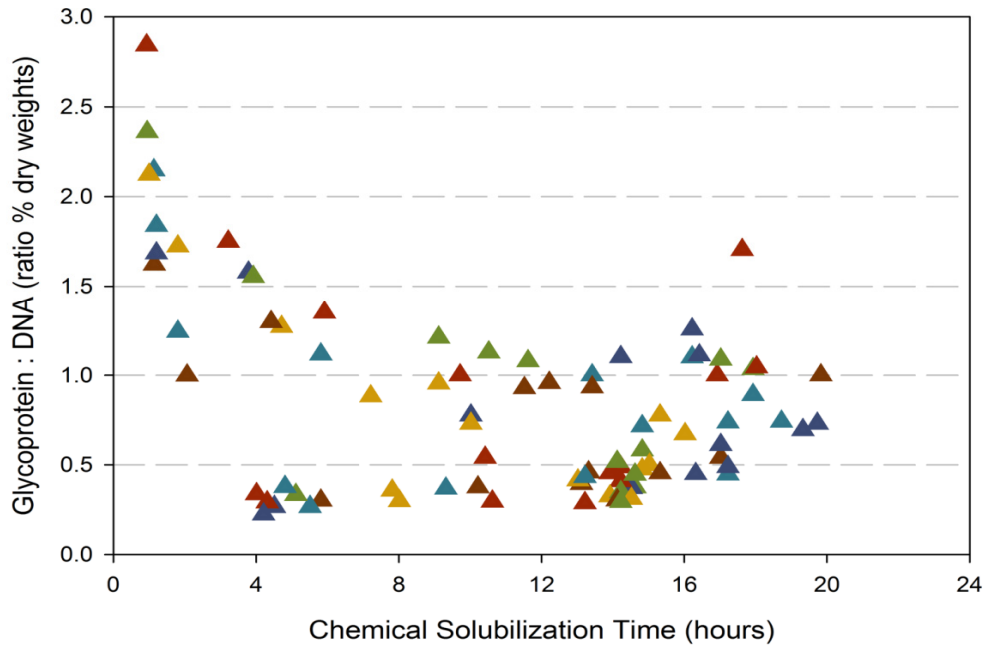

**Figure S2.** Examination of the effects of glycoprotein:DNA content ratios on CF sputum solubilization times. The ratios of CF sputum GP to DNA content, both as % of macromolecular dry weight (MDW), were plotted against the time required to completely solubilize the sputum samples. The majority of specimens with the longest solubilization times (i.e. 76% of sputa with solubilization times of >10h), had GP:DNA ratios of <1. In contrast, the sputa with GP:DNA ratios >1.5 typically were solubilized in <4 h. Plotted as GP:DNA ratios vs solubilization time, there was a weak negative correlation in increasing ratios (i.e. more GP % MDW than DNA % of MDW), with trend line  $y = -0.0441x + 1.3278$ ,  $R^2 = 0.2072$ ). Of note, combining GP % MDW + DNA % MDW and plotting the combined % of MDW, (not shown here), showed more of a positive trend, with increase in total % of solids made up of DNA and GP slightly predicting increased solubilization times, ( $y = 0.1811x + 9.2664$ ,  $R^2 = 0.3513$ ).
