# Supplementary material
Source: MDPI journal article supplement (https://www.mdpi.com/2673-527X/1/1/2)
Supplement: s1 [file s1]

Archive with 5 entries (5 files):
- FigS2.pdf
- Table S1.pdf
- Table S2.pdf
- Table S3.pdf
- FigS1.pdf
